# Supplementary material for: Tunable valley polarization and high Curie temperature in two-dimensional GdF2/WSe2 van der Waals heterojunctions
Source: Royal Society of Chemistry journal article supplement (doi:10.1039/d4cp03578j), 2024-01-01
Supplement: d4cp03578j1.pdf [file d4cp03578j1.pdf]

*Electronic Supplementary Information for*

**Tunable valley polarization and high Curie temperature in two-dimensional GdF<sub>2</sub>/WSe<sub>2</sub> van der Waals heterojunction**

Xu Zhang, Kai Zhang, Yadong Zhu\*, Baozeng Zhou\*, and Xiaocha Wang\*

*Tianjin Key Laboratory of Film Electronic & Communicate devices, School of Integrated Circuit Science and Engineering, Tianjin University of Technology, Tianjin 300384, China*

\*Corresponding Authors

[yadong\\_zhu@163.com](mailto:yadong_zhu@163.com) (Yadong Zhu)

[baozeng@tju.edu.cn](mailto:baozeng@tju.edu.cn) (Baozeng Zhou)

[wangxc@email.tjut.edu.cn](mailto:wangxc@email.tjut.edu.cn) (Xiaocha Wang)

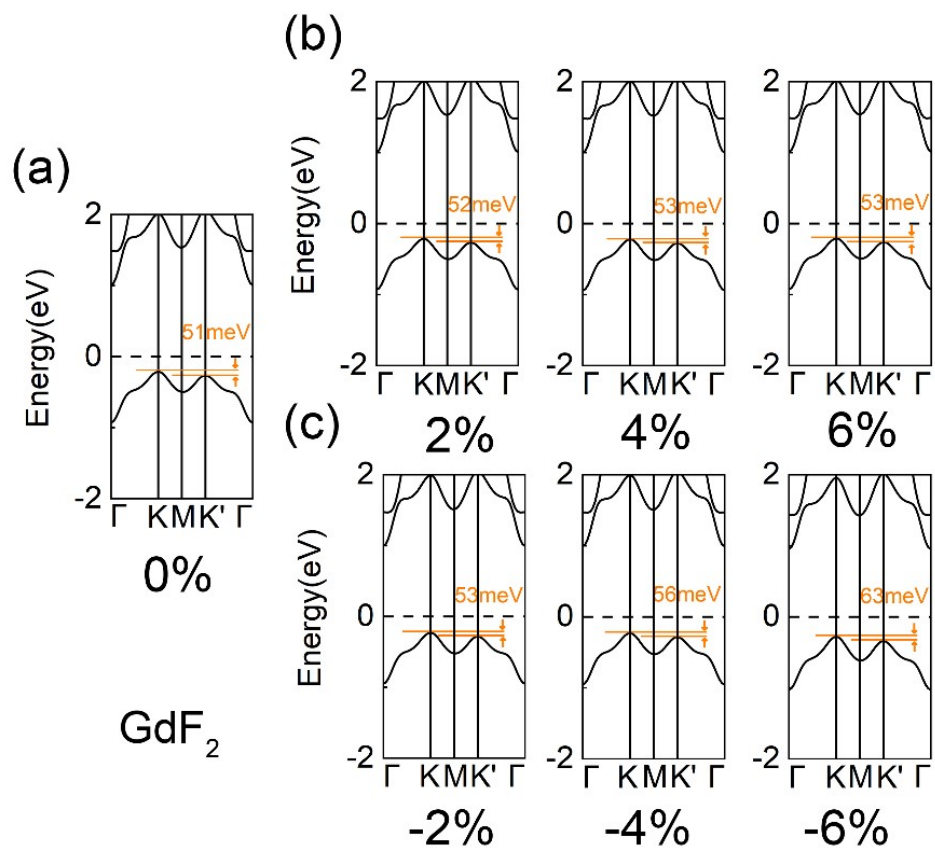

**Fig. S1** The band structure of  $\text{GdF}_2$  when (a) no strain is applied, (b) tensile strain and (c) compressive strain are applied.

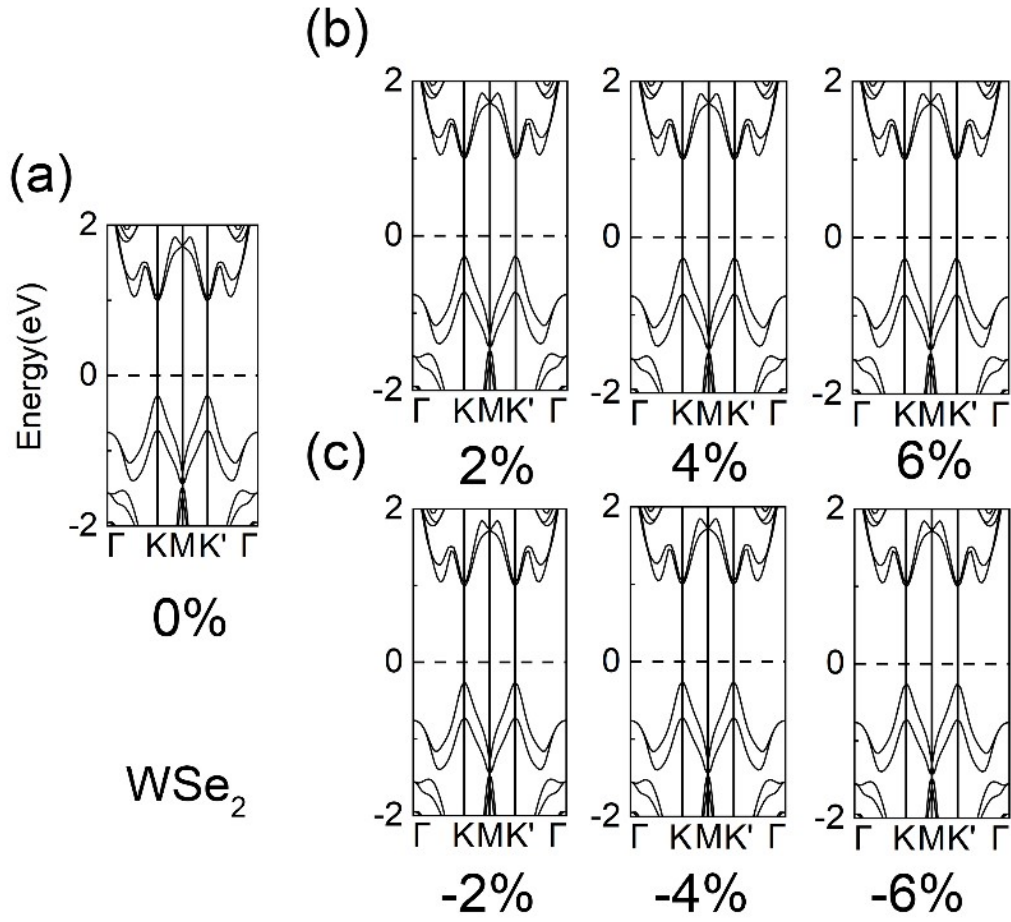

**Fig. S2** The band structure of  $\text{WSe}_2$  when (a) no strain is applied, (b) tensile strain and (c) compressive strain are applied.

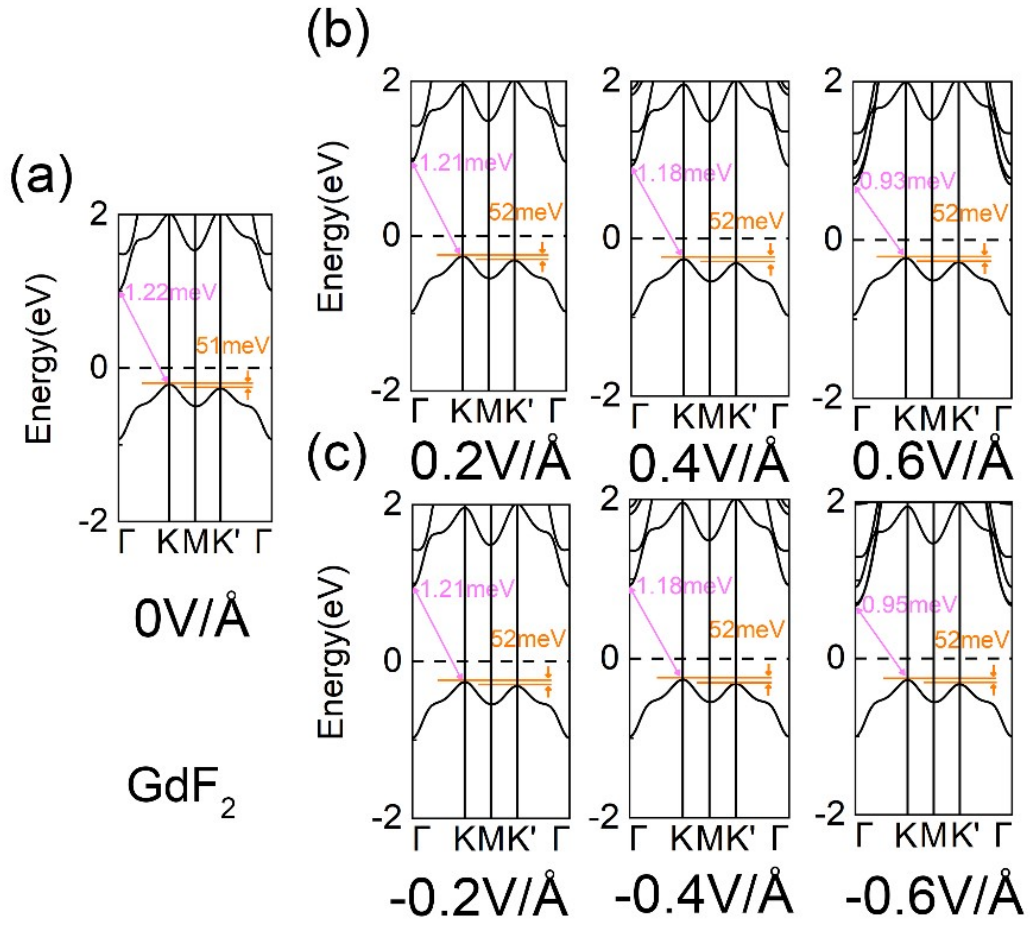

**Fig. S3** The band structure of  $\text{GdF}_2$  (a) without external electric field, (b) with positive electric field and (c) negative electric field.

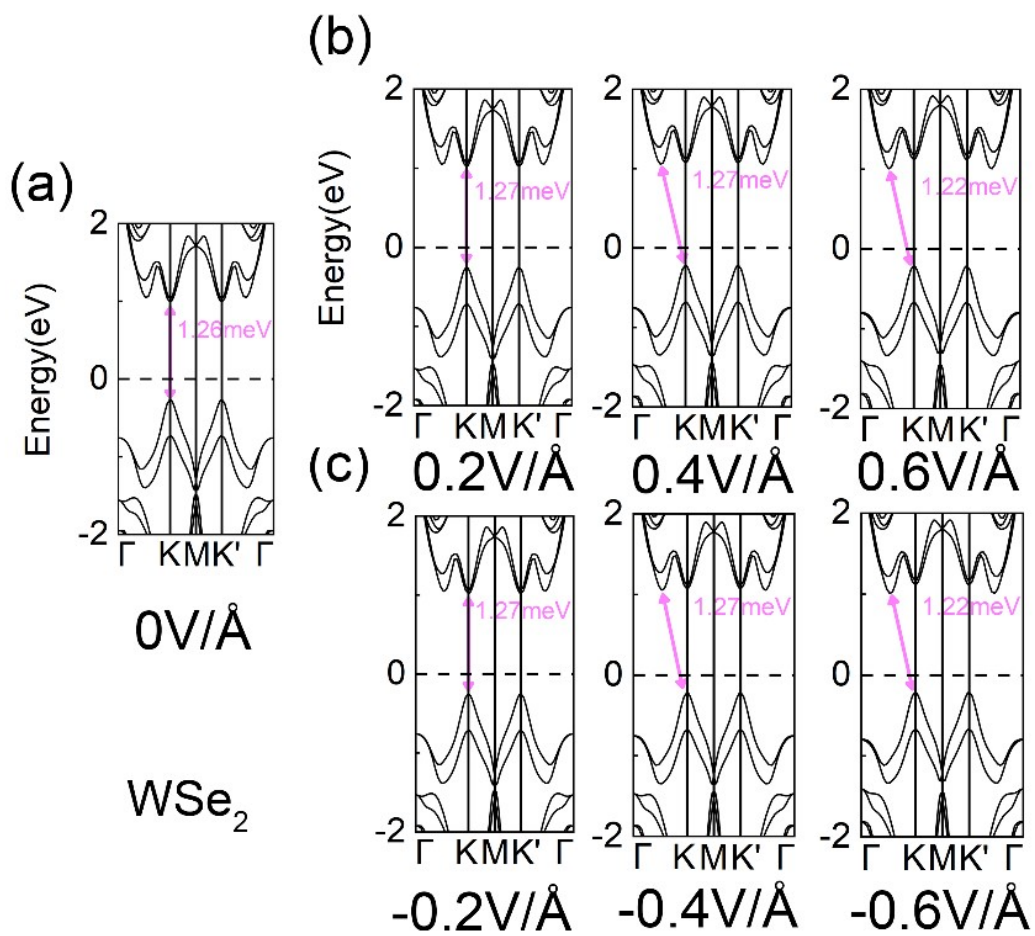

**Fig. S4** The band structure of  $\text{WSe}_2$  (a) without external electric field, (b) with positive electric field and (c) negative electric field.

**Table S1.** In Model1-6, the total energy (eV) of the GdF<sub>2</sub>/WSe<sub>2</sub> heterojunction, and the energies of the ML GdF<sub>2</sub> and WSe<sub>2</sub>, respectively.

|         | $E_{GdF_2/WSe_2}$ | $E_{GdF_2}$ | $E_{WSe_2}$ |
|---------|-------------------|-------------|-------------|
| Model-1 | -50.093901        | -27.652289  | -21.641195  |
| Model-2 | -50.165071        | /           | /           |
| Model-3 | -50.157111        | /           | /           |
| Model-4 | -50.161071        | /           | /           |
| Model-5 | -50.1607          | /           | /           |
| Model-6 | -50.094409        | /           | /           |

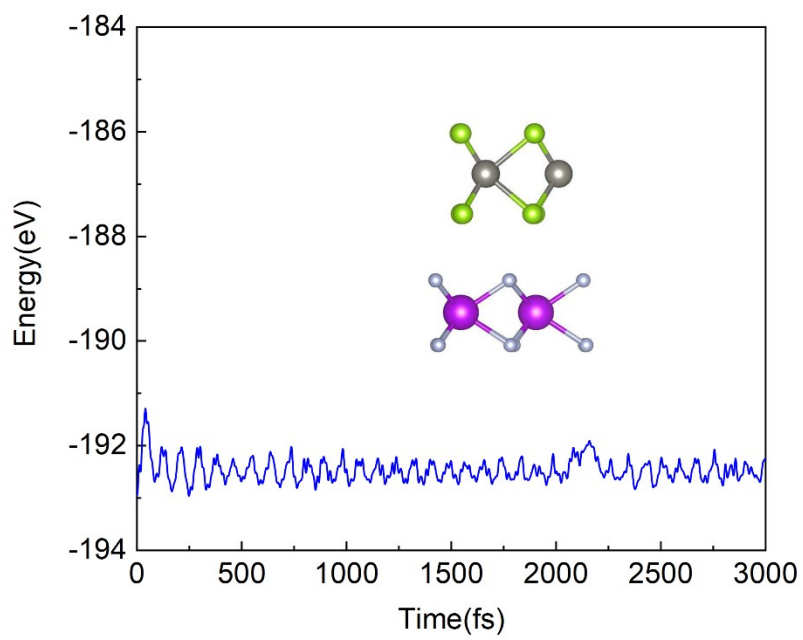

**Fig. S5** Variation of the total free energy during the 3000 fs AIMD simulation of the  $\text{GdF}_2/\text{WSe}_2$  supercell at 300K.

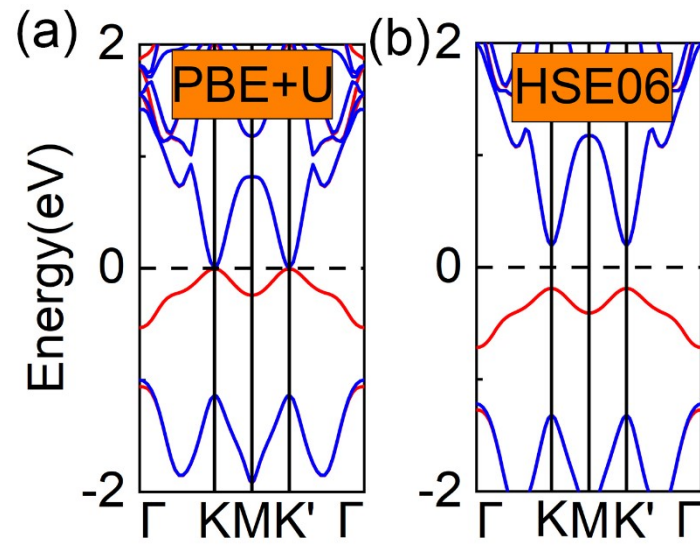

**Fig. S6** The band structures of  $\text{GdF}_2/\text{WSe}_2$  calculated by the (a) PBE+ $U$  and (b) HSE06.



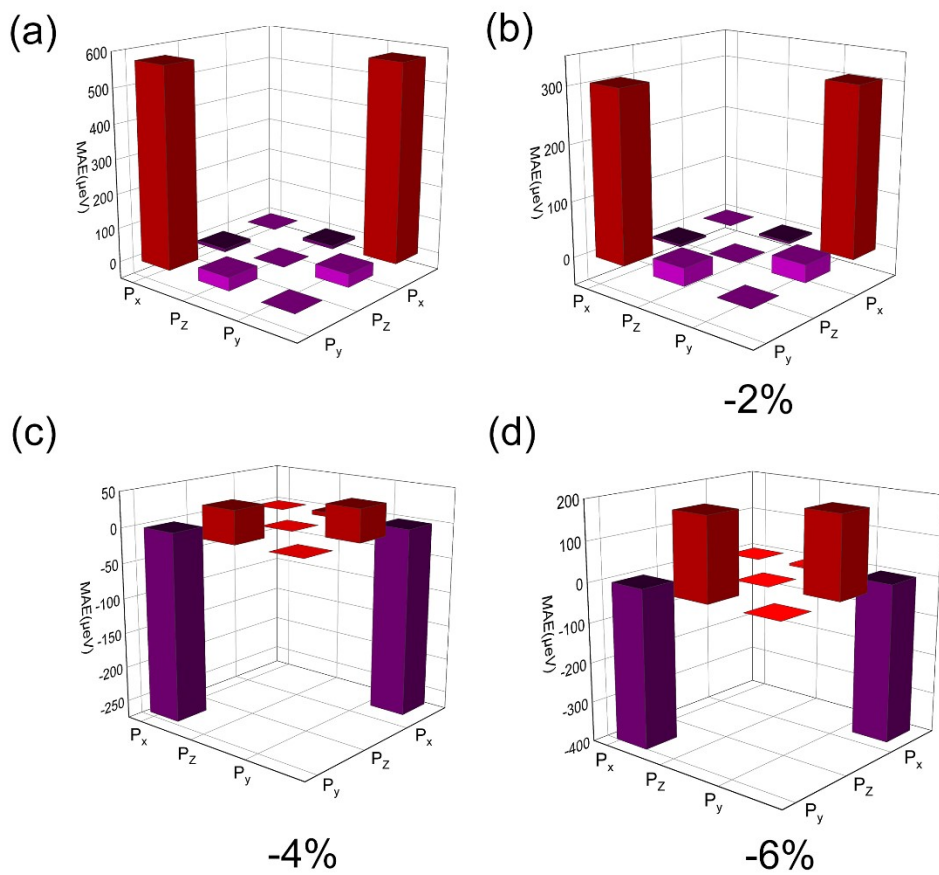

**Fig. S7** Orbital resolved MAE of Gd-p in the  $GdF_2/WSe_2$  heterojunction at (a) no strain, (b) -2% strain, (c) -4% strain and (d) -6% strain.

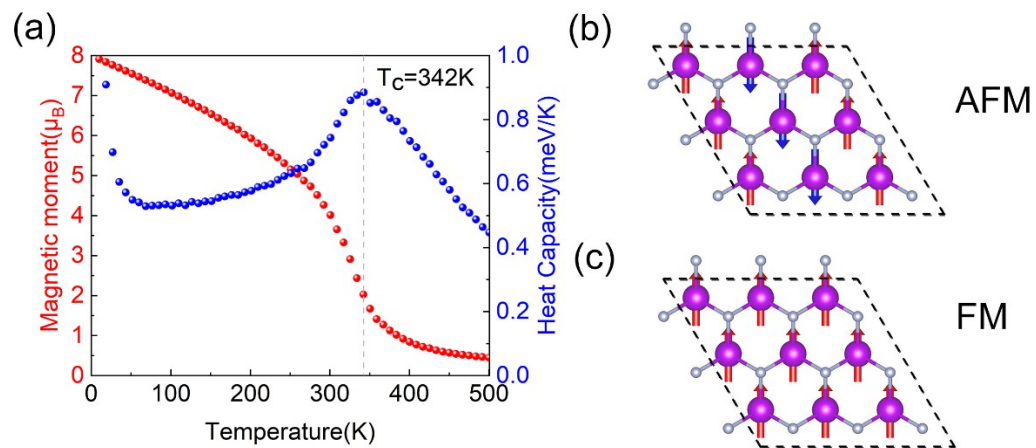

**Fig. S8** Curie temperature of the monolayer (a) GdF<sub>2</sub>. The (b) AFM and (c) FM states of the GdF<sub>2</sub>: red arrow shows the direction of spin-up and the blue arrow shows the direction of spin-down.

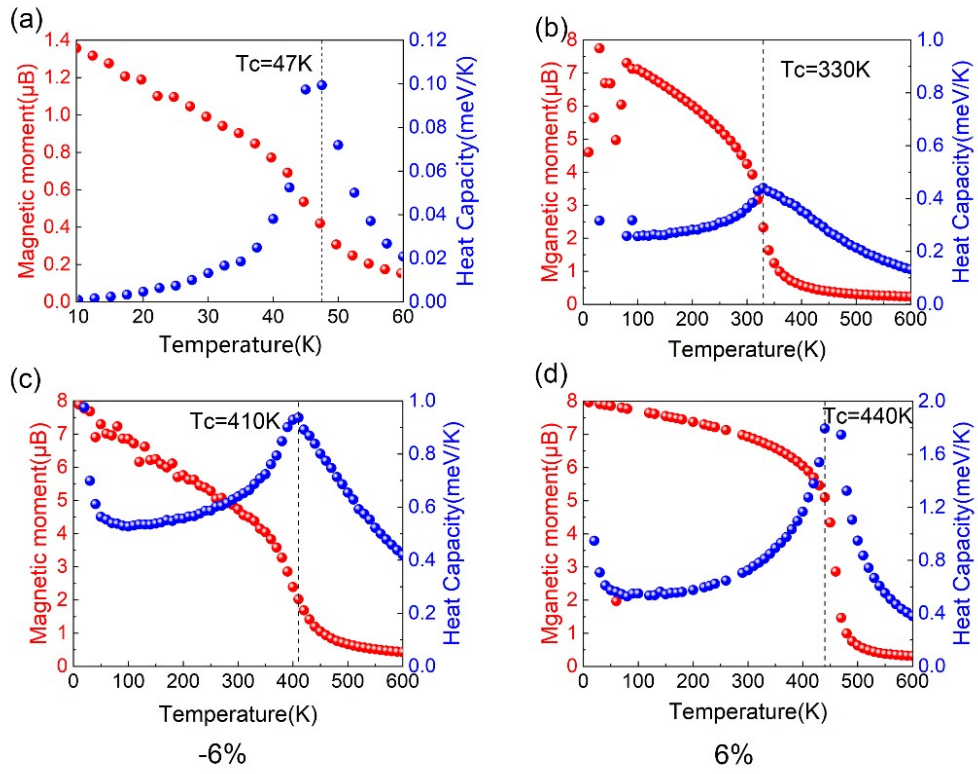

**Fig. S9** (a) The  $T_c$  of  $\text{CrI}_3$ . The  $T_c$  of  $\text{GdF}_2/\text{WSe}_2$  when (b) no strain is applied, (c) -6% strain and (d) 6% strain are applied.
